# Supplementary material for: Critical role of SP thymocyte motility in regulation of thymic output in neonatal Aire−/− mice
Source: PubMed Central journal article supplement (PMC5352200; doi:10.18632/oncotarget.13909), 2016-12-11
Supplement: oncotarget-08-83-s001.pdf [file oncotarget-08-83-s001.pdf]

## Critical role of SP thymocyte motility in regulation of thymic output in neonatal *Aire*<sup>-/-</sup> mice

### Supplementary Material

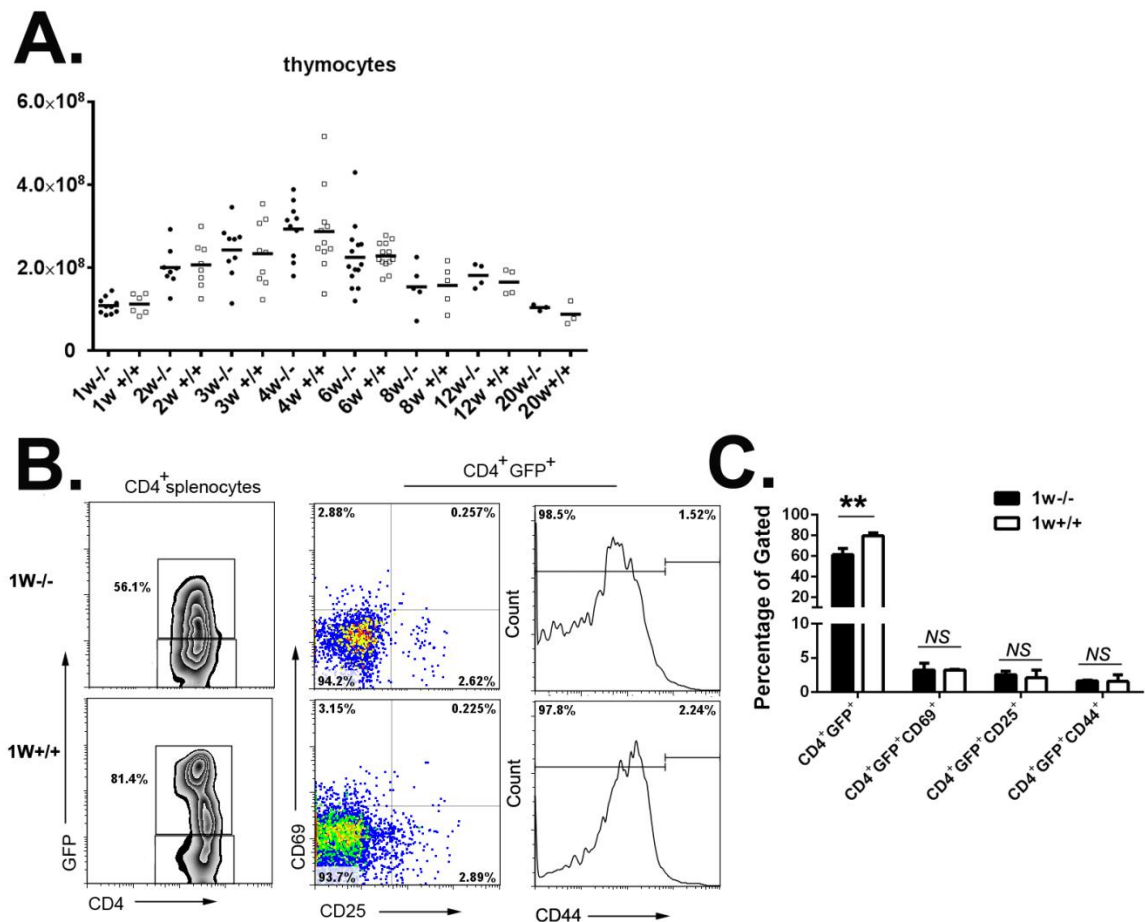

### Supplementary Figure S1

**Total number of thymocytes and RTE phenotype.** **A.** The cell number of thymocytes from 1-20 weeks old *Aire* KO mice and littermates. **B.** Representative dot plots of GFP expression on CD4<sup>+</sup> splenocytes from 1-week old *Aire*<sup>-/-</sup> RAG-GFP mice and littermates were shown on the left panel. CD69, CD25 and CD44 expression on CD4<sup>+</sup>GFP<sup>+</sup> RTEs were shown on the right panel. **C.** The ratio of RTEs and CD69, CD25 and CD44 expression on CD4<sup>+</sup>GFP<sup>+</sup> RTEs were summarized. Data from 5 mice are shown as mean  $\pm$  SD. \*\*  $p < 0.01$ , \*\*\*  $p < 0.001$ . NS, no significance.

## Supplementary Movies

1. [Supplementary Movie 1 \(1.14MB\)](#)  
Migration of CD4SP cells(green) within the medulla of 2 weeks-old *Aire*<sup>-/-</sup> mice.  
Blood vessels(red).
2. [Supplementary Movie 2 \(1.14MB\)](#)  
Migration of CD4SP cells(green) within the medulla of 2 weeks-old *Aire*<sup>+/+</sup> mice.  
Blood vessels(red).
3. [Supplementary Movie 3 \(1.15MB\)](#)  
Migration of CD4SP cells(green) within the medulla of 6 weeks-old *Aire*<sup>-/-</sup> mice.  
Blood vessels(red).
4. [Supplementary Movie 4 \(1.16MB\)](#)  
Migration of CD4SP cells(green) within the medulla of 6 weeks-old *Aire*<sup>+/+</sup> mice.  
Blood vessels(red).
5. [Supplementary Movie 5 \(1.16MB\)](#)  
Migration of CD4SP cells(green) incubated with CCL19 within the medulla of 2 weeks-old *Aire*<sup>-/-</sup> mice. Blood vessels(red).
6. [Supplementary Movie 6 \(1.21MB\)](#)  
Migration of CD4SP cells(green) incubated with CCL19 within the medulla of 2 weeks-old *Aire*<sup>+/+</sup> mice. Blood vessels(red).

For Supplementary Videos 1–6 see Supplementary Files.
